# Supplementary material for: Synthesis, spectroscopic characterization, photochemical and photophysical properties and biological activities of ruthenium complexes with mono- and bi-dentate histamine ligand
Source: Royal Society of Chemistry journal article supplement (doi:10.1039/c2dt12136k), 2012-01-01
Supplement: c2dt12136k.pdf [file c2dt12136k.pdf]

## Supplementary Information

### Synthesis, spectroscopic characterization, photochemical and photophysical properties and biological activities of Ruthenium complexes with mono- and bi-dentate histamine ligand.

Carolina Riverin Cardoso, Inara de Aguiar, Mariana Romano Camilo, Márcia Valéria Lima, Amando Siuti Ito, Maurício da Silva Baptista, Christiane Pavani, Tiago Venâncio, Rose Maria Carlos

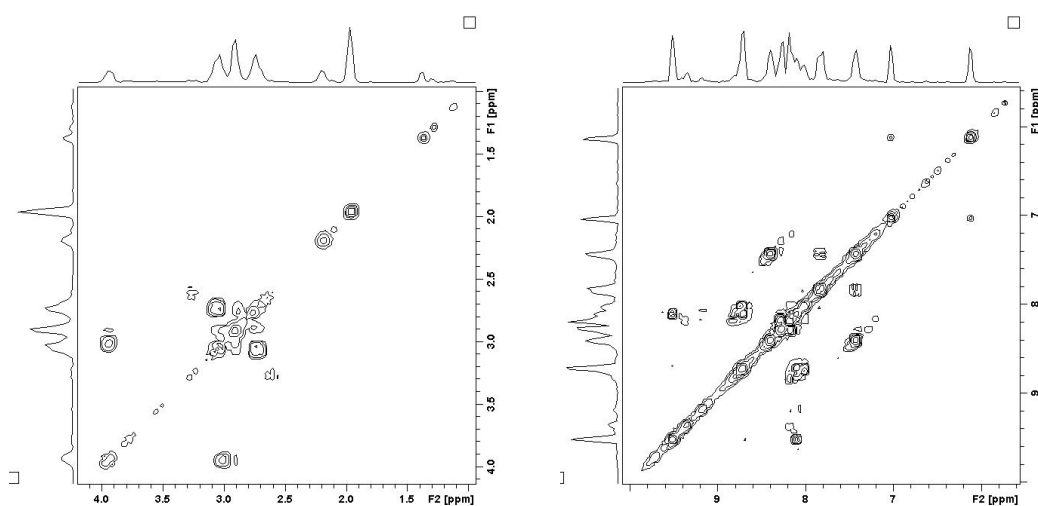

**Figure S1:** ( $^1\text{H}$ - $^1\text{H}$ )COSY spectra for complex **2A** in  $\text{CD}_3\text{CN}$ .

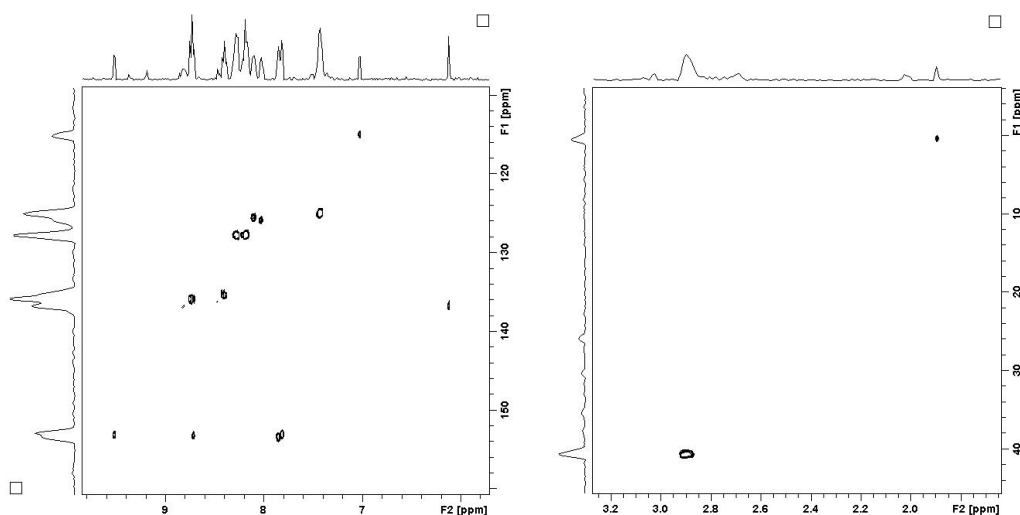

**Figure S2:** ( $^1\text{H}$ - $^{13}\text{C}$ )HSQC spectra for complex **2A** in  $\text{CD}_3\text{CN}$ .

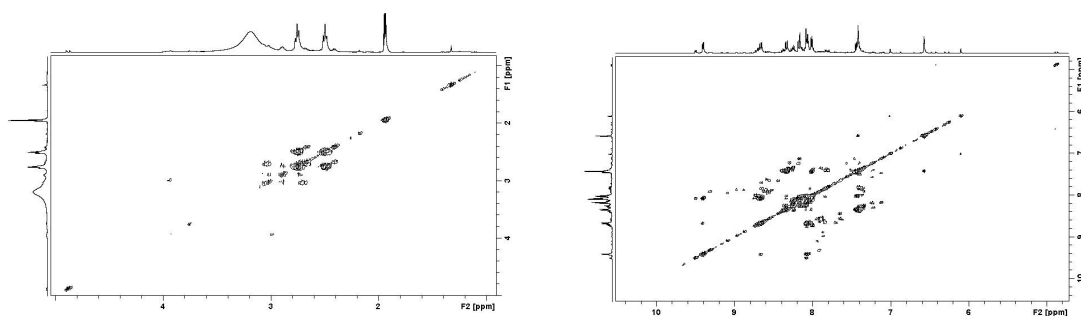

**Figure S3:** ( $^1\text{H}$ - $^1\text{H}$ )COSY spectra for complex (**1R+2A**) in  $\text{CD}_3\text{CN}$ .

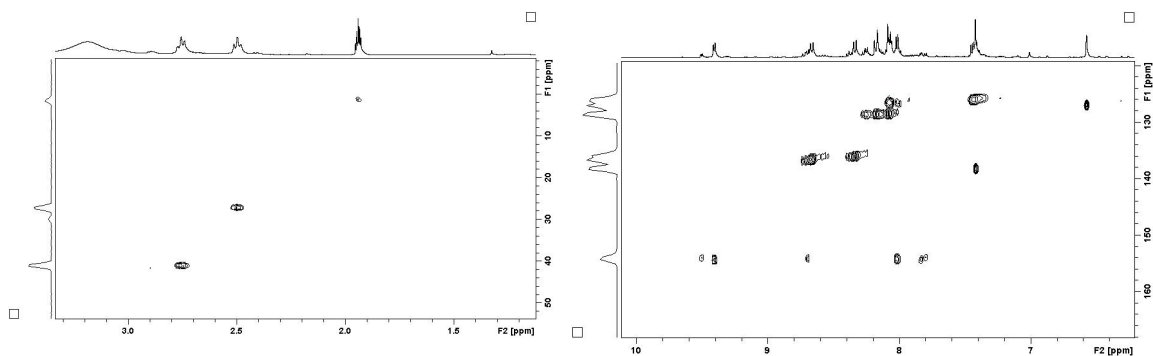

**Figure S4:** ( $^1\text{H}$ - $^{13}\text{C}$ )HSQC spectra for complex (**1R+2A**) in  $\text{CD}_3\text{CN}$ .
